# Supplementary material for: Mendelian randomization integrating GWAS and eQTL data reveals genetic determinants of complex and clinical traits
Source: PubMed Central journal article supplement (PMC6656778; doi:10.1038/s41467-019-10936-0), 2019-07-24
Supplement: 41467_2019_10936_MOESM1_ESM.pdf [file 41467_2019_10936_MOESM1_ESM.pdf]

## **Supplementary Information**

**Mendelian Randomization integrating GWAS and eQTL data  
reveals genetic determinants of complex and clinical traits**

**Porcu et al.**

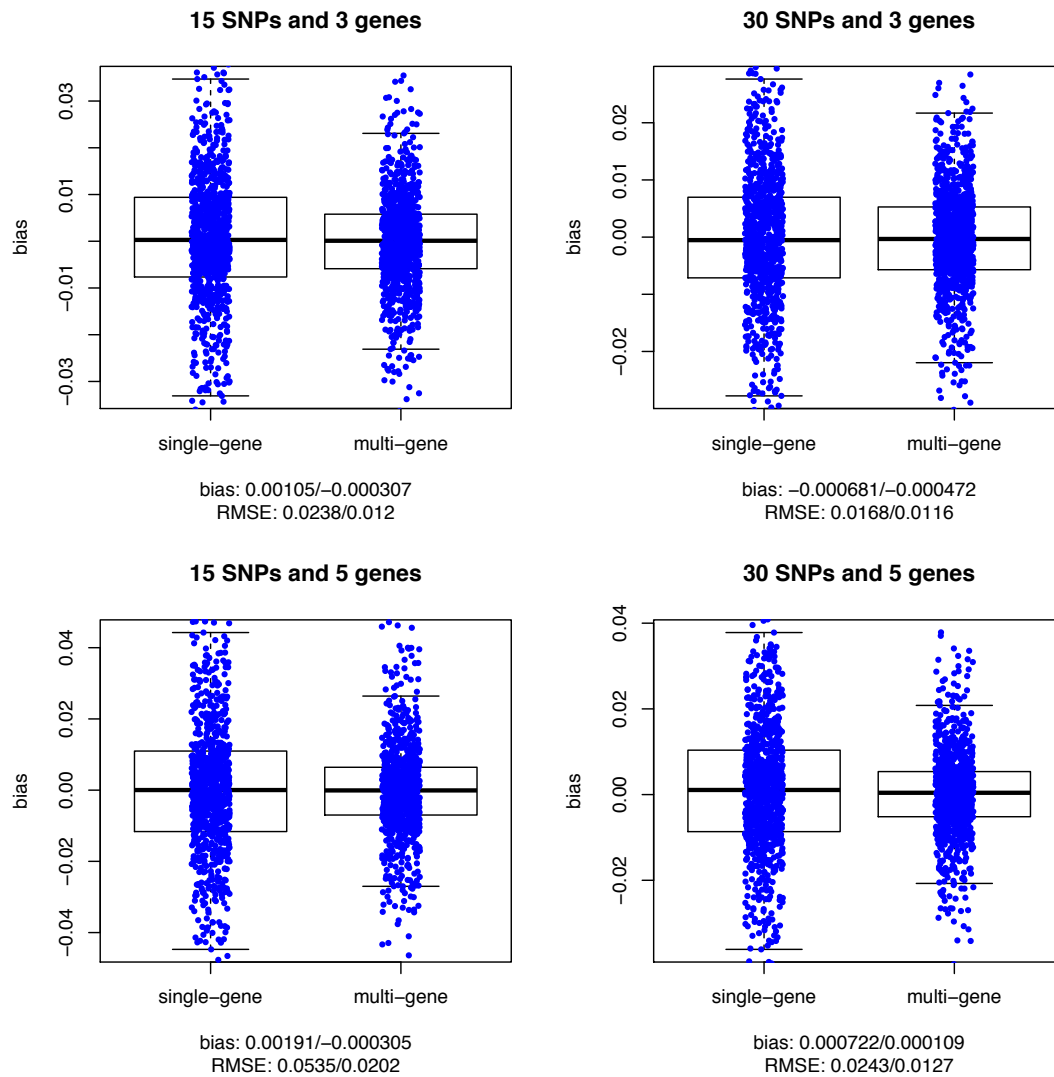

Supplementary Figure 1. Simulation analyses results. We simulated four regions containing 15 and 30 SNPs and 3 and 5 genes assuming a degree of pleiotropy from a Poisson distribution ( $\lambda=0.2$ , i.e.  $\lambda$  is the mean of the number of genes affected by the SNP) and for each scenario we calculated the bias (i.e.: the difference between the observed and the true value) and the Root Mean Squared Error (RMSE) for the single- and multi-gene MR approach.

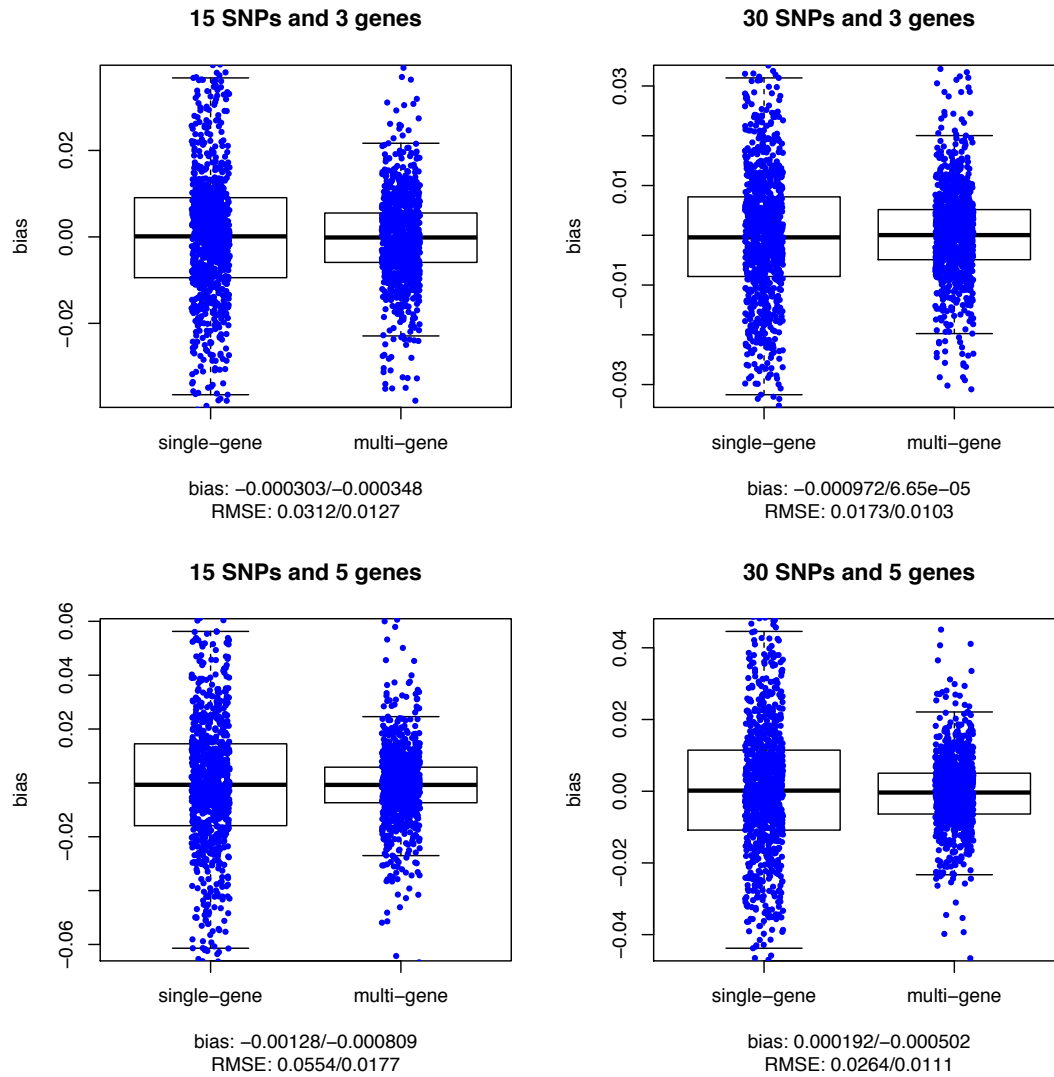

Supplementary Figure 2. Simulation analyses results. We simulated four regions containing 15 and 30 SNPs and 3 and 5 genes assuming a degree of pleiotropy from a Poisson distribution ( $\lambda=0.4$ , i.e.  $\lambda$  is the mean of the number of genes affected by the SNP) and for each scenario we calculated the bias (i.e.: the difference between the observed and the true value) and the Root Mean Squared Error (RMSE) for the single- and multi-gene MR approach.

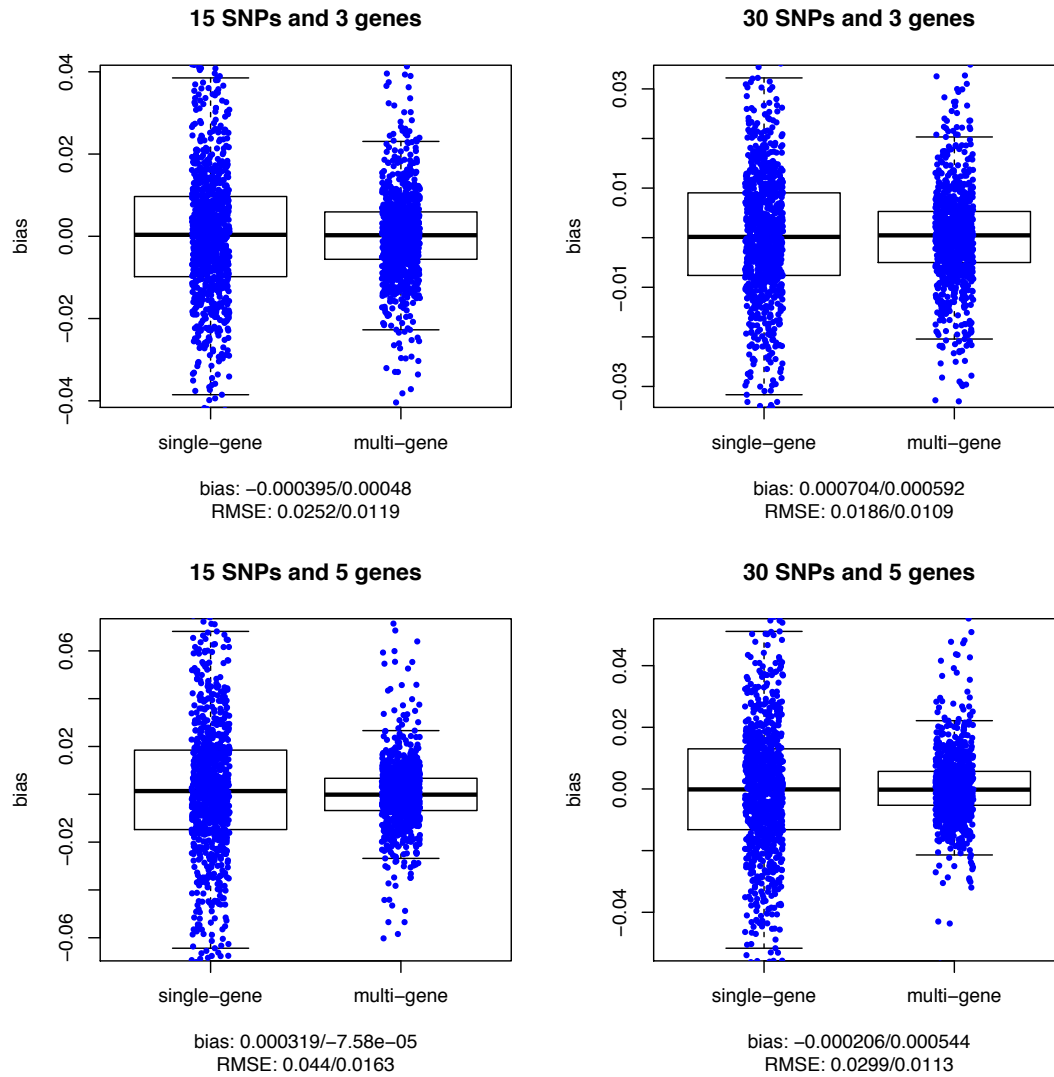

Supplementary Figure 3. Simulation analyses results. We simulated four regions containing 15 and 30 SNPs and 3 and 5 genes assuming a degree of pleiotropy from a Poisson distribution ( $\lambda=0.6$ , i.e.  $\lambda$  is the mean of the number of genes affected by the SNP) and for each scenario we calculated the bias (i.e.: the difference between the observed and the true value) and the Root Mean Squared Error (RMSE) for the single- and multi-gene MR approach.

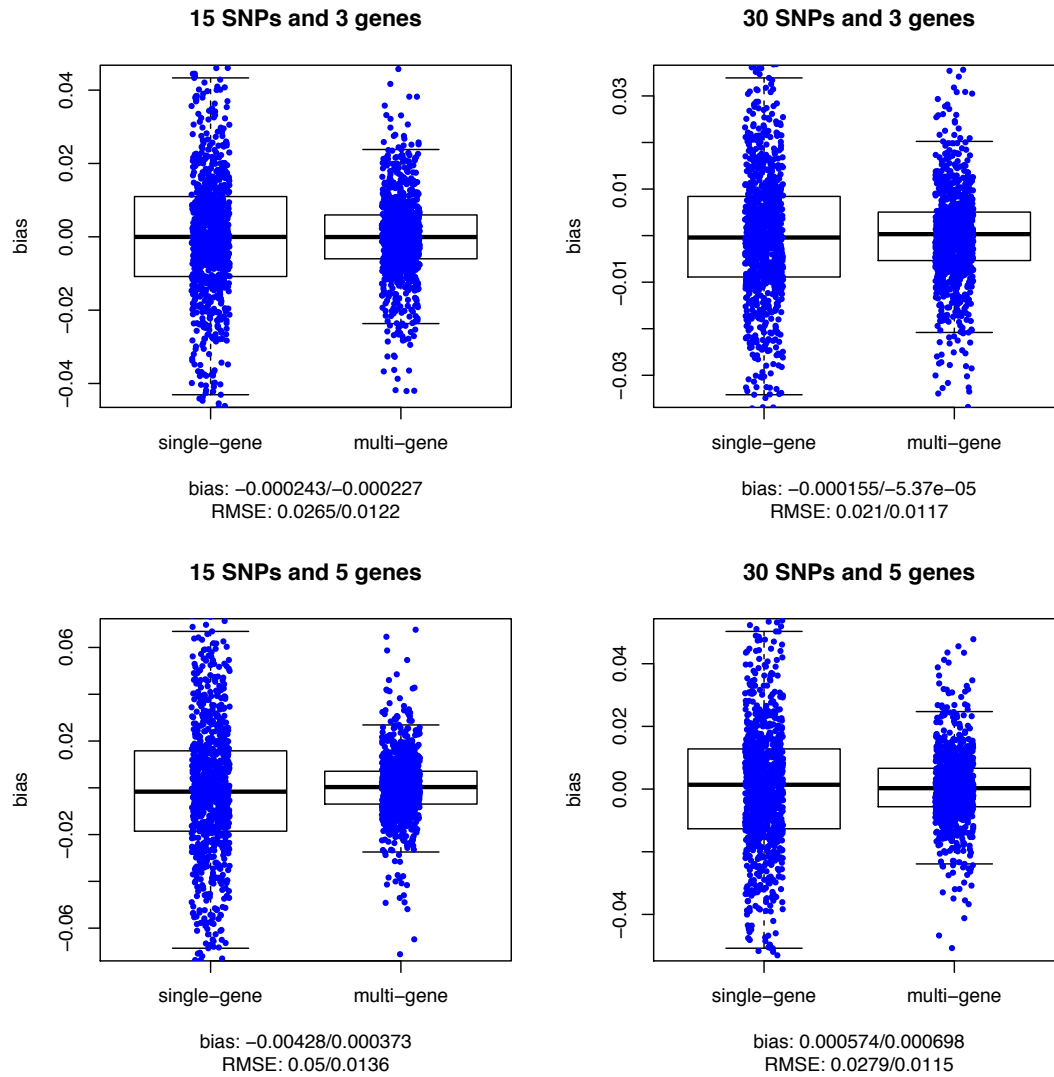

Supplementary Figure 4. Simulation analyses results. We simulated four regions containing 15 and 30 SNPs and 3 and 5 genes assuming a degree of pleiotropy from a Poisson distribution ( $\lambda=0.8$ , i.e.  $\lambda$  is the mean of the number of genes affected by the SNP) and for each scenario we calculated the bias (i.e.: the difference between the observed and the true value) and the Root Mean Squared Error (RMSE) for the single- and multi-gene MR approach.

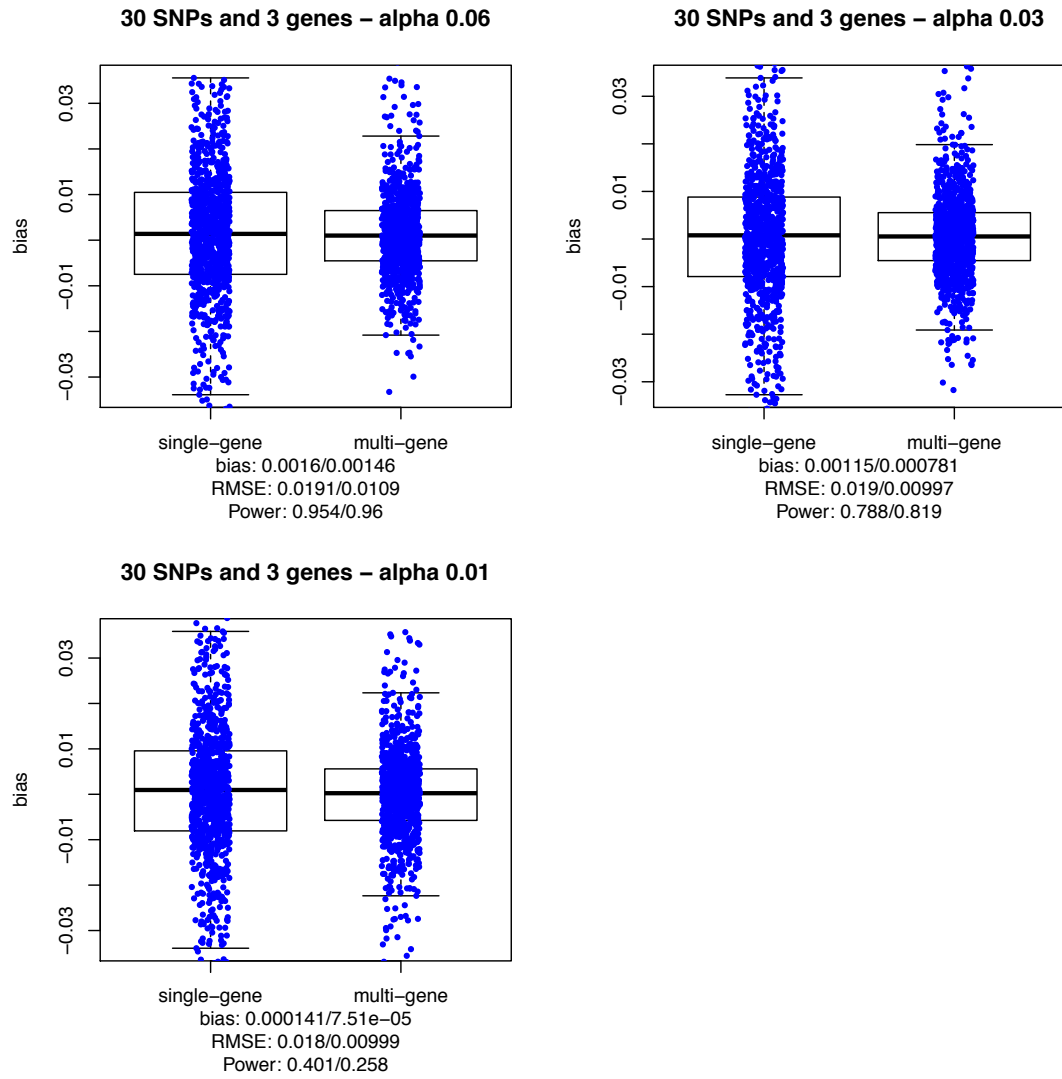

Supplementary Figure 5. Simulation analyses results. We simulated three different causal effects of the gene expression on the trait ( $\alpha=0.06, 0.03$  and  $0.01$ ) in a region containing 30 SNPs and 3 genes assuming a degree of pleiotropy from a Poisson distribution ( $\lambda=0.6$ , i.e.  $\lambda$  is the mean of the number of genes affected by the SNP). We calculated the power as the ratio of number of times we obtained  $P_{MR}<0.05$  and the number of simulations (1,000).

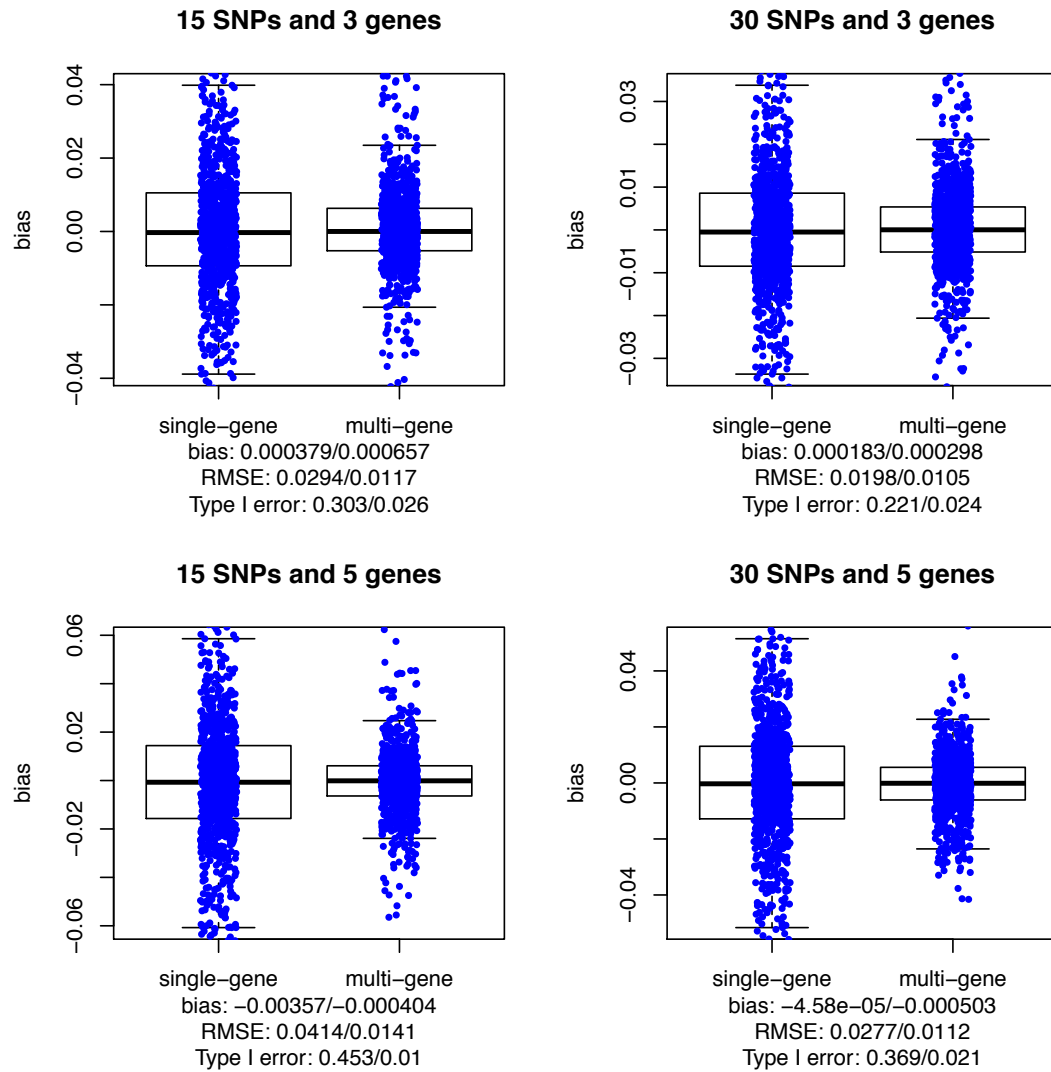

Supplementary Figure 6. Simulation analyses results. We assume a zero causal effect of the gene expression on the trait ( $\alpha=0$ ) in four regions containing 15 and 30 SNPs and 3 and 5 genes assuming a degree of pleiotropy from a Poisson distribution ( $\lambda=0.6$ , i.e.  $\lambda$  is the mean of the number of genes affected by the SNP). We calculated the type I error as the ratio of number of times we obtained  $P_{MR}<0.05$  and the number of simulations (1,000).

### Pleiotropic effect

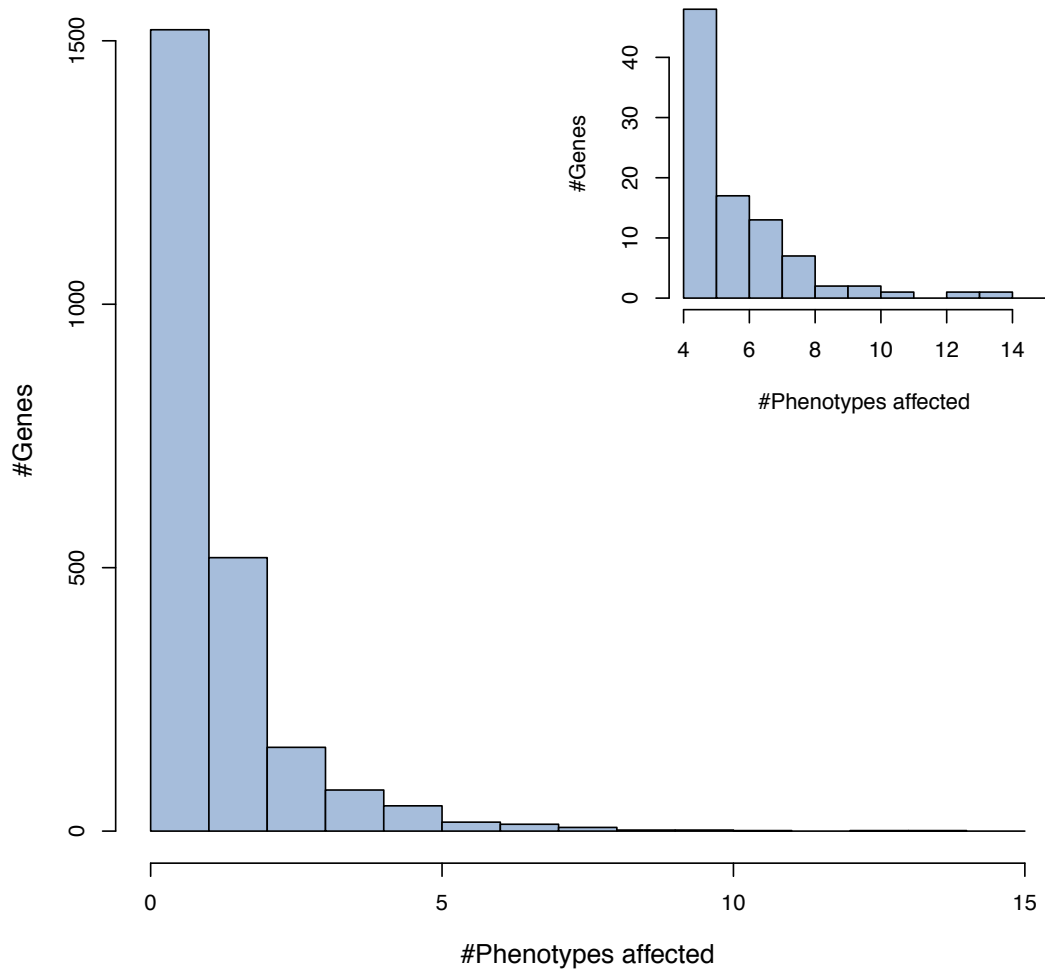

Supplementary Figure 7. Number of genes associated with multiple phenotypes.



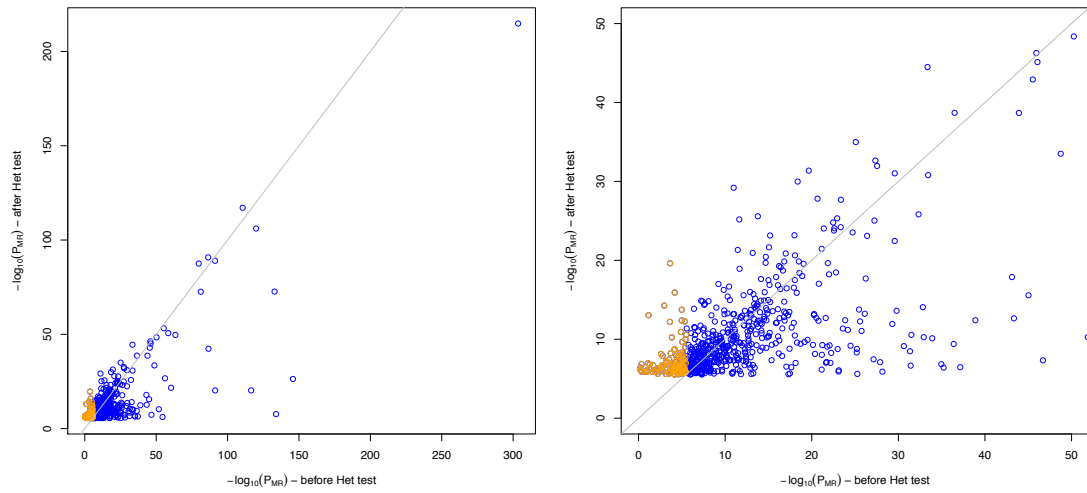

Supplementary Figure 8. P-values of genes showing heterogeneity. Shown are the results from multi-instrument and multi-exposure MR analysis after the outlier removal (y-axis) compared with those (x-axis) before the outlier removal. In orange are the genes that pass the P-value threshold  $3 \times 10^{-6}$  only after the outlier removal. The grey line represents the identity line. (Plot on the right is the zoom in of the plot on the left)

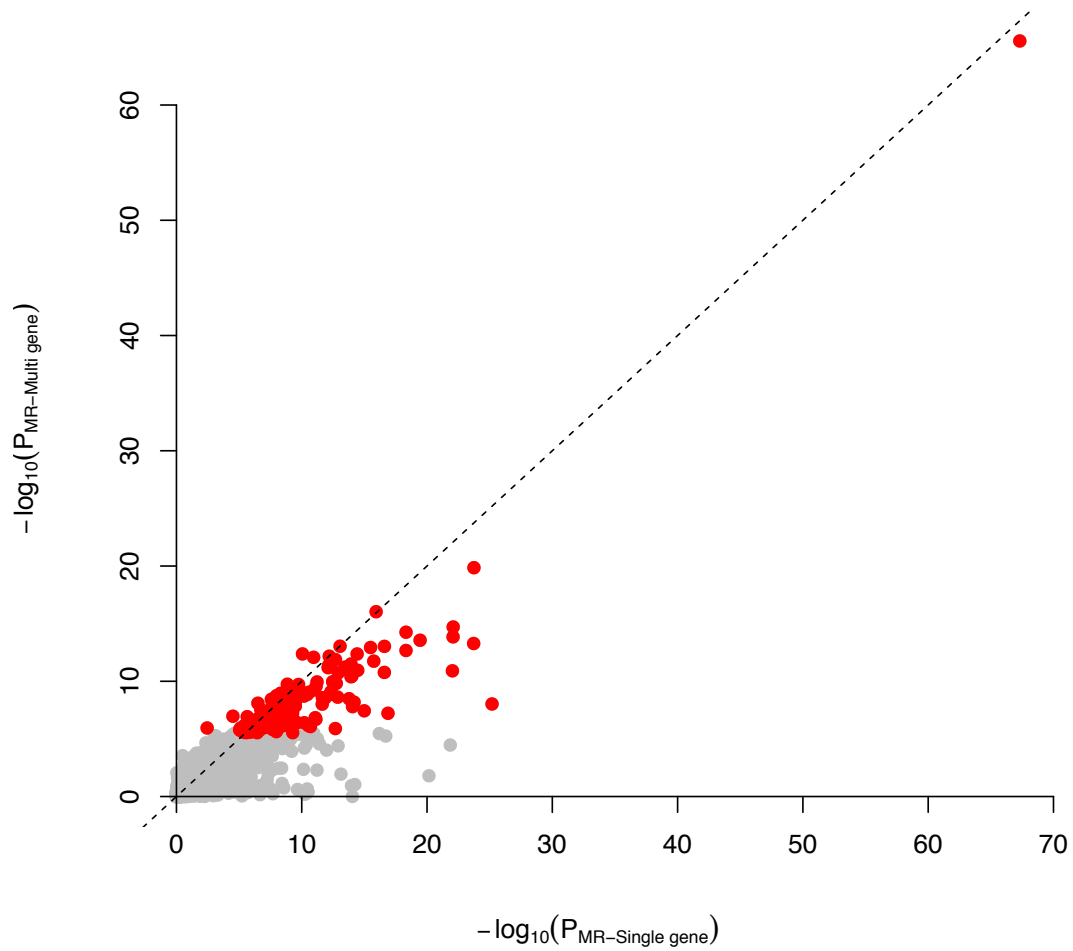

Supplementary Figure 9. Multi- vs Single-exposure MR. Shown are the results from multi-instrument and multi-exposure MR analysis (y-axis) compared with those from the multi-instruments and single-exposure MR analysis (x-axis) on menarche. In grey are the genes that do not pass the P-value threshold  $3 \times 10^{-6}$  in the multi-instrument and multi-exposure MR analysis. The dotted line represents the identity line.

### Associations missed by GWAS

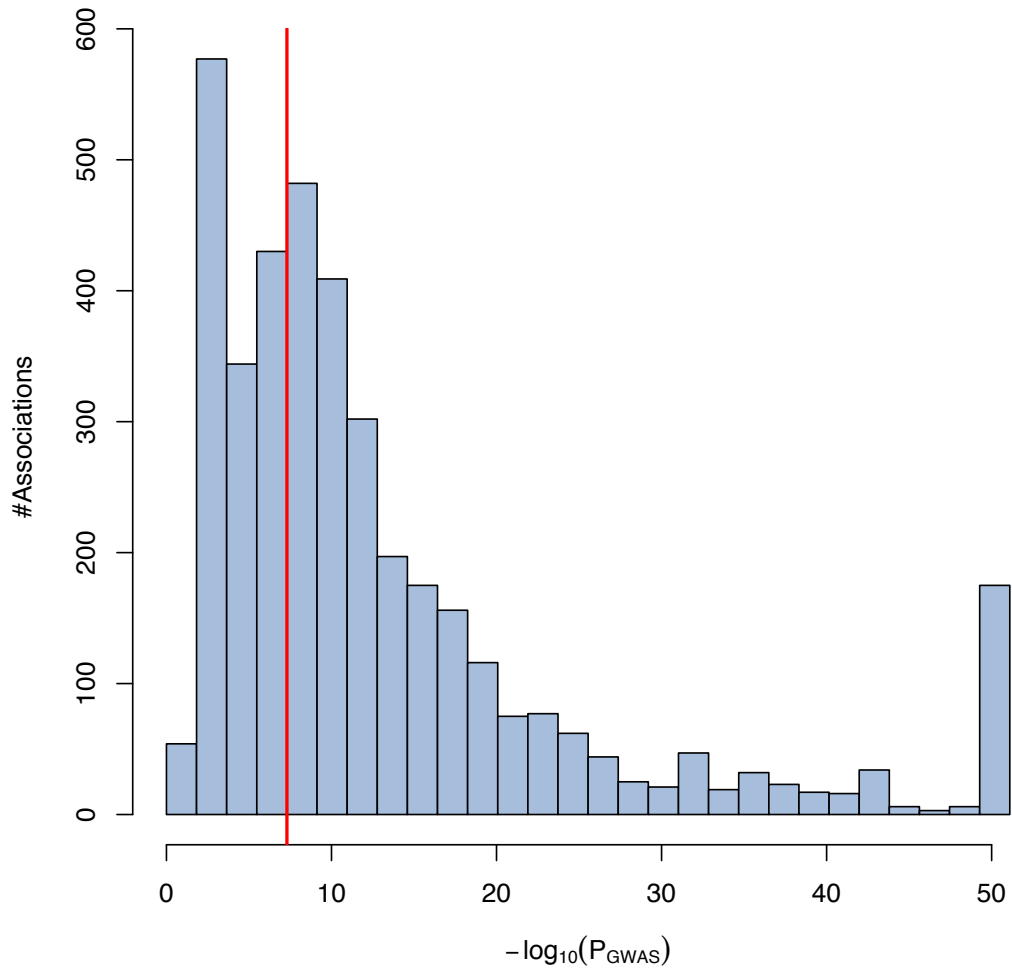

Supplementary Figure 10. Distribution of topSNP association P-values at reported putative causal genes. For each gene, the best SNP pvalue at +/-500kb is reported. The red line represents genome-wide significance.

### MR pvalue for closest genes

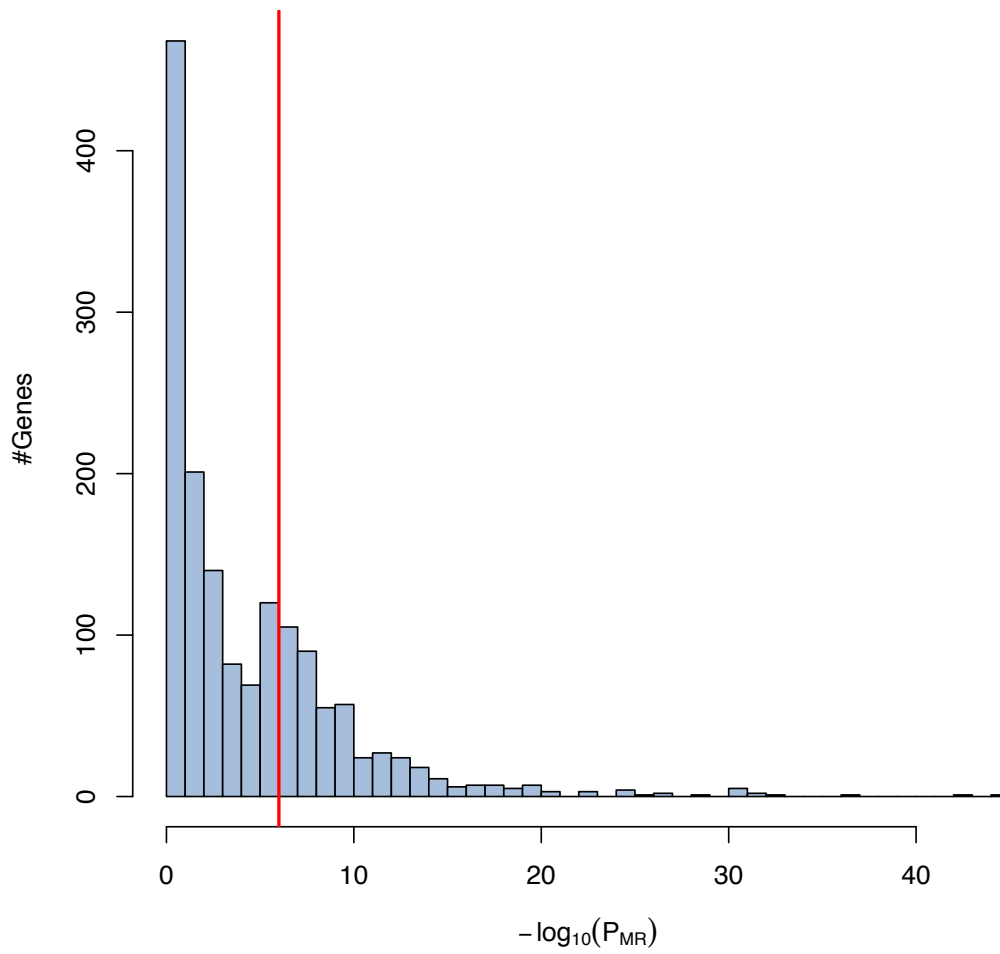

Supplementary Figure 11. Distribution of the MR-pvalues for the nearest genes. For the 1,125 MR significant regions harbouring at least one genome-wide significant SNP, we plotted the MR-pvalue of the gene closest to the top SNP in the region. The red line represents MR significance threshold.

**A** LDL – Global Lipids Consortium 2010

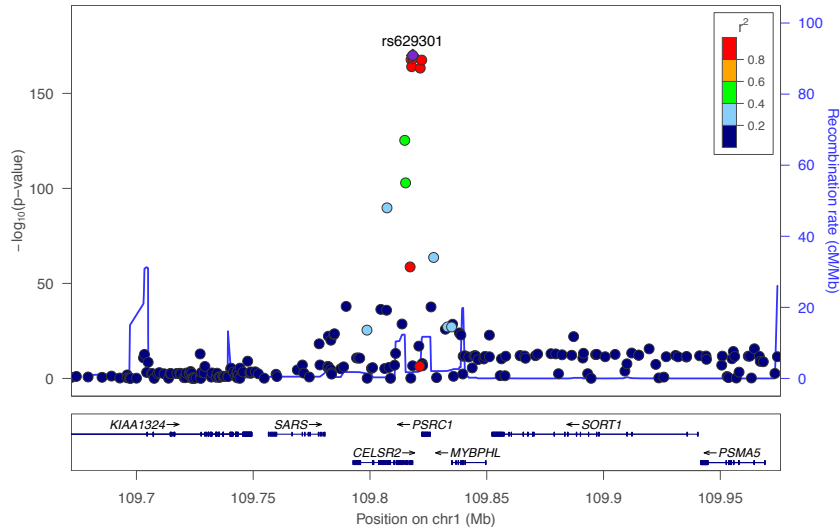

**B**

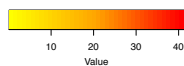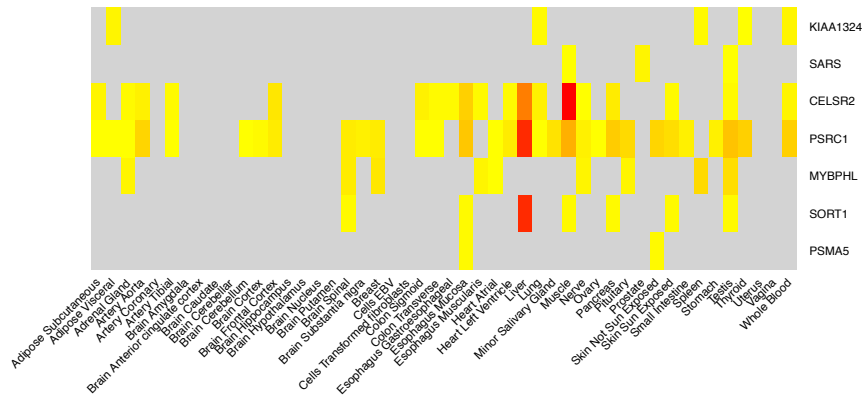

Supplementary Figure 12. Tissue-specific effects of *SORT1* on LDL. **a.** Regional association plot showing genome-wide significant locus for LDL at *SORT1* gene region. Representation of the single-SNP association strength (y axis shows the  $-\log_{10}$  p-value) versus the genomic positions (on hg19/GRCh37 genomic build; x axis) around the most significant SNP, which is indicated with a purple dot. Other SNPs in the region are color coded to reflect their LD with the top SNP, as in the left inset (taken from pairwise  $r^2$  values calculated on 1000 Genomes Project phase 3 haplotypes). Genes and the position of exons, as well as the direction of transcription, are noted in lower boxes. This plot was drawn using the standalone version of the LocusZoom package (Pruim et al., 2010). **b.** Tissue-specific causal effects. Rows list genes and columns list tissues. Darker points correspond to higher association. The genes highlighted in grey were not tested.

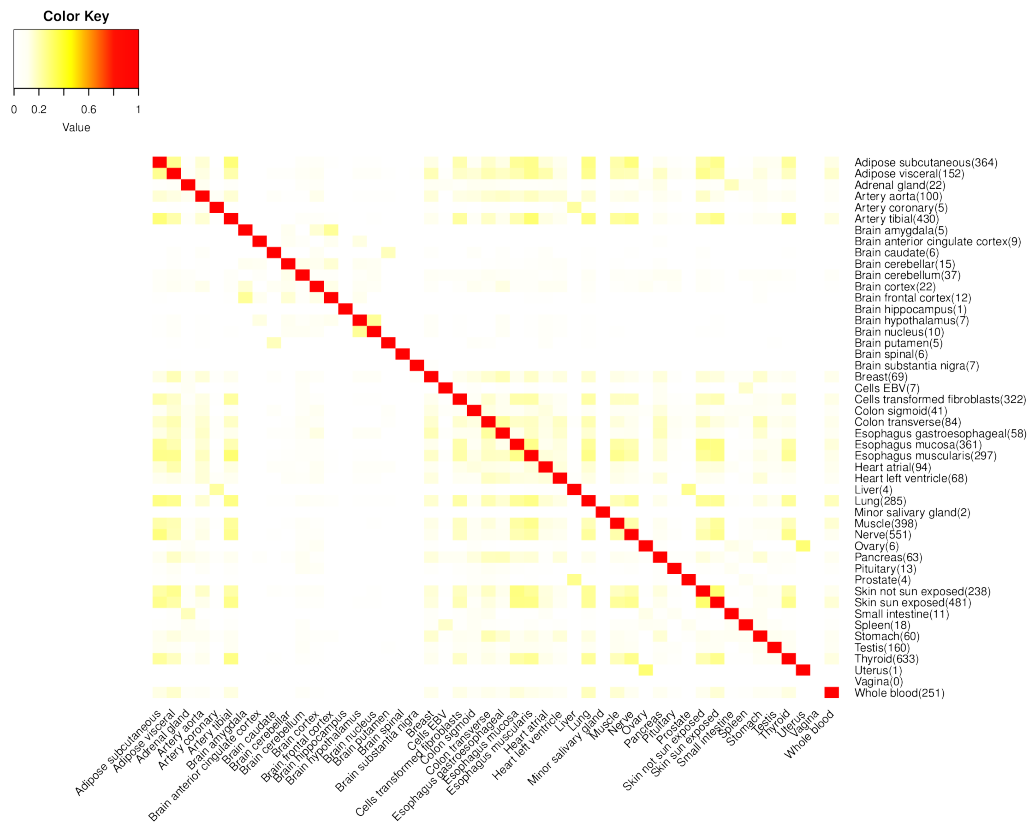

Supplementary Figure 13. Estimates of eGenes sharing among the 48 GTEx tissues. The heatmap represents the portion of eGenes, which have at least 4 instrumental variables, shared among the tissues for Crohn's disease. Each cell shows the portion of shared eGenes calculated using the Jaccard index.

### Heterogeneity Test – Height

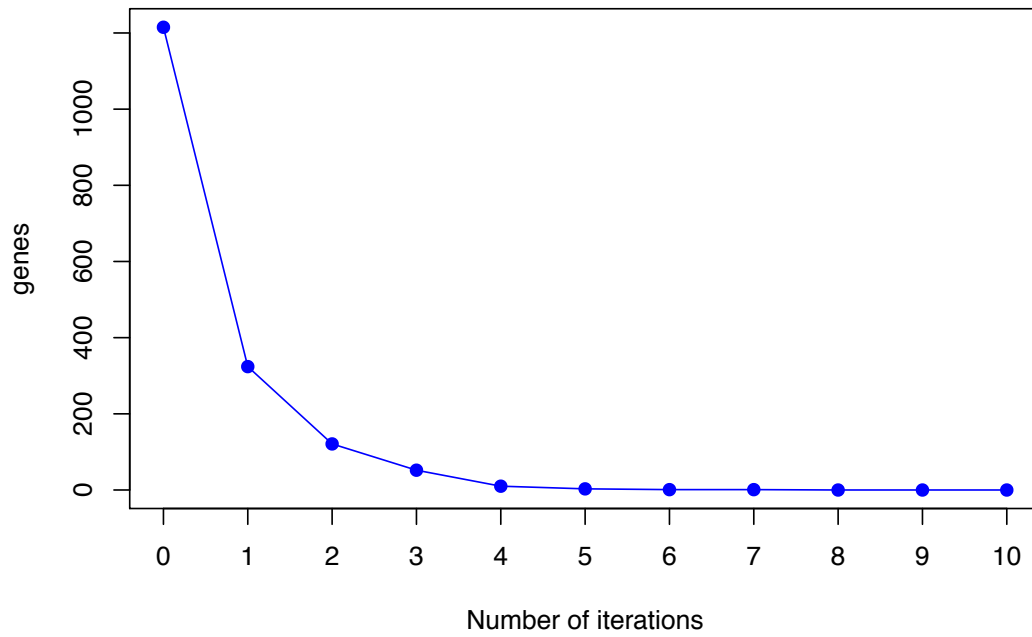

Supplementary Figure 14. The number of genes with significant P-value in heterogeneity test. The number of genes with  $P_{\text{het}} < 10^{-4}$  for height. At each iteration, for the genes showing significant pleiotropy, we remove the most pleiotropic SNP and then repeat the test. We observed that after 3 iterations we corrected more than 90% of the genes and after 5 we reach a plateau.

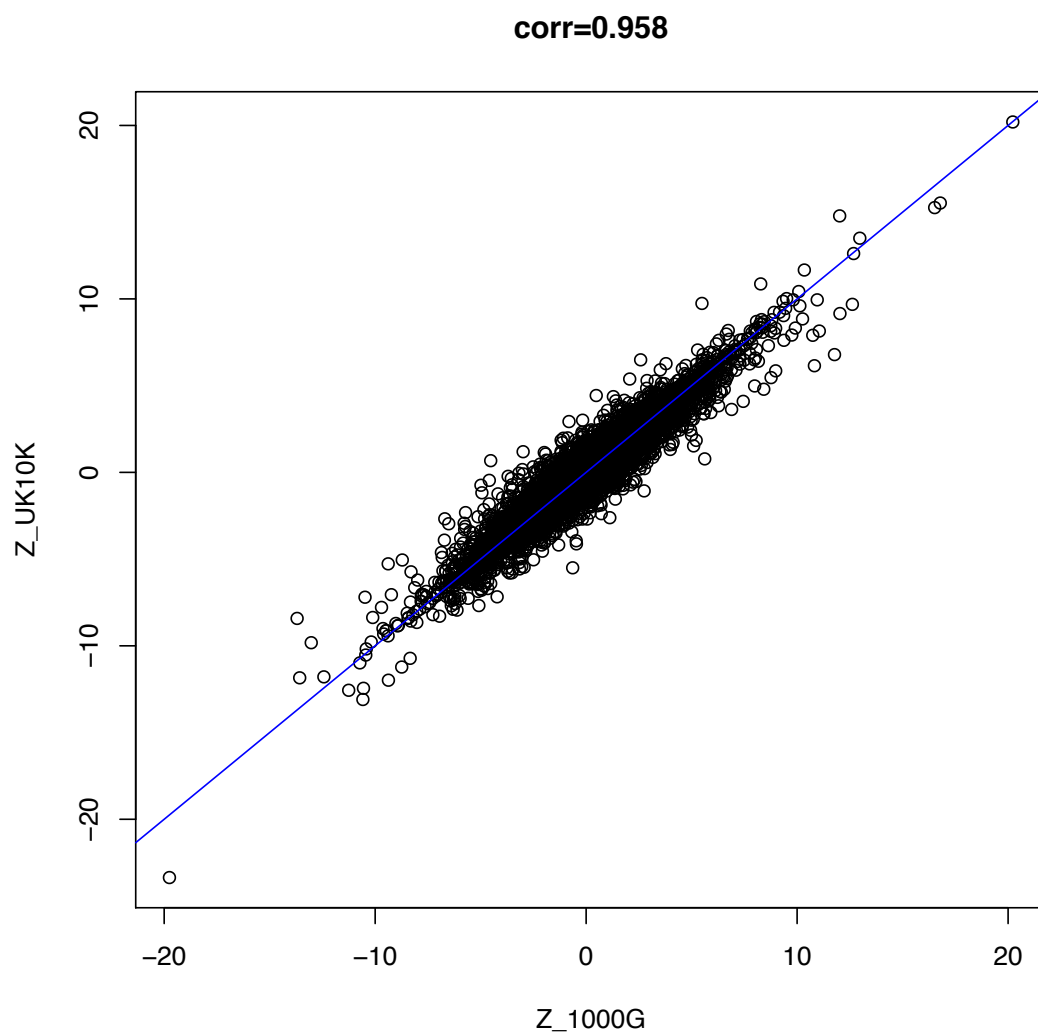

Supplementary Figure 15. UK10K vs 1000g-EUR reference panel. Shown are the results (Z-scores) from multi-instrument and multi-exposure MR analysis applied using UK10K reference panel (y-axis) compared with those from the same approach but using 1000G-EUR on height. The blue line represents the identity line.



**Supplementary Table 1.** Phenotypes analyzed in this study

| TRAIT                         | Abbreviation | N (case/control) | Significant genes | missed by GWAS | %missed by GWAS | N tastable gene | Ref                                                                                    |
|-------------------------------|--------------|------------------|-------------------|----------------|-----------------|-----------------|----------------------------------------------------------------------------------------|
| Alzheimer's Disease           | AD           | 25,580 / 48,466  | 17                | 10             | 58.8            | 14,772          | Lambert et al (2013) [1]                                                               |
| Amyotrophic Lateral Sclerosis | ALS          | 12,577 / 23,475  | 8                 | 7              | 87.5            | 14,849          | van Rheenen et al (2016) [2]                                                           |
| Basophils                     | BASO         | 173,480          | 61                | 16             | 26.2            | 15,086          | Astle et al (2016) [3]                                                                 |
| Body Mass Index               | BMI          | 339,224          | 31                | 6              | 19.4            | 13,864          | Locke et al (2015) [4]                                                                 |
| Coronary Artery Disease       | CAD          | 60,801 / 123,504 | 27                | 19             | 70.4            | 15,041          | Nikpay et al (2015) [5]                                                                |
| Crohn's Disease               | CD           | 5,956 / 14,927   | 61                | 16             | 26.2            | 15,147          | Liu et al (2015) [6]                                                                   |
| Childhood Body Mass Index     | cBMI         | 35,668           | 24                | 19             | 79.2            | 13,859          | Felix et al (2015) [7]                                                                 |
| Depressive symptoms           | DEPRESSION   | 161,460          | 1                 | 1              | 100.0           | 14,686          | Okbay et al (2016) [8]                                                                 |
| Diastolic blood pressure      | DP           | 69,899           | 13                | 7              | 53.9            | 13,854          | International Consortium for Blood Pressure Genome-Wide Association Studies (2011) [9] |
| Educational attainment        | EDU          | 111,483          | 76                | 37             | 48.7            | 15,129          | Okbay et al (2016) [10]                                                                |
| Eosinophils                   | EO           | 173,480          | 175               | 38             | 21.7            | 15,085          | Astle et al (2016) [3]                                                                 |
| Fasting Glucose               | FG           | 96,496           | 5                 | 1              | 20.0            | 13,973          | Manning et al (2012) [11]                                                              |
| Fasting Insulin               | FI           | 96,496           | 5                 | 1              | 20.0            | 13,984          | Manning et al (2012) [11]                                                              |
| High-Density Lipoprotein      | HDL          | 99,900           | 204               | 162            | 79.4            | 13,889          | Teslovich et al (2010) [12]                                                            |
| Height                        | HEIGHT       | 253,288          | 374               | 43             | 11.5            | 13,849          | Wood et al (2014) [13]                                                                 |
| Hemoglobin                    | HGB          | 173,480          | 108               | 12             | 11.1            | 15,086          | Astle et al (2016) [3]                                                                 |
| Heart Rate                    | HR           | 181,171          | 11                | 6              | 54.5            | 13,836          | den Hoed et al (2014) [14]                                                             |
| Inflammatory Bowel Disease    | IBD          | 12,882 / 21770   | 69                | 20             | 29.0            | 15,154          | Liu et al (2015) [6]                                                                   |
| Insomnia                      | INSOMNIA     | 113,006          | 3                 | 3              | 100.0           | 15,075          | Hammerschlag et al (2017) [15]                                                         |
| Intelligence                  | IQ           | 78,308           | 17                | 9              | 52.9            | 15,076          | Sniekers et al (2017) [16]                                                             |
| Low-Density Lipoprotein       | LDL          | 95,454           | 177               | 150            | 84.7            | 13,889          | Teslovich et al (2010) [12]                                                            |
| Lymphocytes                   | LYMPH        | 173,480          | 179               | 35             | 19.6            | 15,086          | Astle et al (2016) [3]                                                                 |
| Mean Corpuscular Volume       | MCV          | 173,480          | 214               | 20             | 9.3             | 15,086          | Astle et al (2016) [3]                                                                 |
| Mean arterial blood pressure  | MABP         | 29,182           | 9                 | 5              | 55.6            | 13,830          | International Consortium for Blood Pressure Genome-Wide Association Studies (2011) [9] |
| Menarche                      | MENARCHE     | 329,345          | 155               | 37             | 23.9            | 15,029          | Day et al (2017) [17]                                                                  |
| Menopause                     | MENOPAUSE    | 69,360           | 53                | 16             | 30.2            | 13,748          | Day et al (2015) [18]                                                                  |

|                                |             |                  |     |     |       |        |                                                                                        |
|--------------------------------|-------------|------------------|-----|-----|-------|--------|----------------------------------------------------------------------------------------|
| Monocytes                      | MONO        | 173,480          | 185 | 30  | 16.2  | 15,086 | Astle et al (2016) [3]                                                                 |
| Mean Platelet Volume           | MPV         | 173,480          | 194 | 36  | 18.6  | 15,086 | Astle et al (2016) [3]                                                                 |
| Neuroticism                    | NEUROTICISM | 170,911          | 39  | 13  | 33.3  | 14,685 | Okbay et al (2016) [8]                                                                 |
| Neutrophils                    | NEUT        | 173,480          | 175 | 34  | 19.4  | 15,086 | Astle et al (2016) [3]                                                                 |
| Platelets                      | PLT         | 173,480          | 209 | 30  | 14.4  | 15,085 | Astle et al (2016) [3]                                                                 |
| Pulse blood pressure           | PBP         | 74,079           | 8   | 8   | 100.0 | 13,856 | International Consortium for Blood Pressure Genome-Wide Association Studies (2011) [9] |
| Rheumatoid Arthritis           | RA          | 29,880 / 73,758  | 41  | 18  | 43.9  | 14,508 | Okada et al (2014) [19]                                                                |
| Red Blood Cells                | RBC         | 173,480          | 180 | 28  | 15.6  | 15,086 | Astle et al (2016) [3]                                                                 |
| Reticulocytes                  | RET         | 173,480          | 156 | 26  | 16.7  | 15,086 | Astle et al (2016) [3]                                                                 |
| Schizophrenia                  | SCZ         | 36,989 / 113,075 | 122 | 64  | 52.5  | 15,037 | Schizophrenia Working Group of the Psychiatric Genomics Consortium et al (2014) [20]   |
| Subjective Well Being          | SWB         | 298,420          | 5   | 1   | 20.0  | 13,568 | Okbay et al (2016) [8]                                                                 |
| Systolic blood pressure        | SBP         | 69,909           | 14  | 11  | 78.6  | 13,853 | International Consortium for Blood Pressure Genome-Wide Association Studies (2011) [9] |
| Type 2 Diabetes                | T2D         | 26,676 / 132,532 | 44  | 35  | 79.6  | 15,071 | Scott et al (2017) [21]                                                                |
| Total Cholesterol              | TC          | 100,184          | 207 | 169 | 81.6  | 13,887 | Teslovich et al (2010) [12]                                                            |
| Triglycerides                  | TG          | 96,598           | 178 | 154 | 88.8  | 13,887 | Teslovich et al (2010) [12]                                                            |
| Ulcerative Colitis             | UC          | 6,968 / 20,464   | 35  | 15  | 42.9  | 15,148 | Liu et al (2015) [6]                                                                   |
| Waist Hip Ratio (BMI-adjusted) | WHRadjBMI   | 224,459          | 44  | 27  | 61.4  | 13,855 | Shungin et al (2015) [22]                                                              |

**Supplementary Table 2.** Sample size of GTEx tissues

| <b>Tissue</b>                             | <b>Number of RNASeq and Genotyped samples</b> |
|-------------------------------------------|-----------------------------------------------|
| Adipose – Subcutaneous                    | 385                                           |
| Adipose - Visceral (Omentum)              | 313                                           |
| Adrenal Gland                             | 175                                           |
| Artery – Aorta                            | 267                                           |
| Artery – Coronary                         | 152                                           |
| Artery – Tibial                           | 388                                           |
| Brain – Amygdala                          | 88                                            |
| Brain - Anterior cingulate cortex (BA24)  | 109                                           |
| Brain - Caudate (basal ganglia)           | 144                                           |
| Brain - Cerebellar Hemisphere             | 125                                           |
| Brain – Cerebellum                        | 154                                           |
| Brain – Cortex                            | 136                                           |
| Brain - Frontal Cortex (BA9)              | 118                                           |
| Brain – Hippocampus                       | 111                                           |
| Brain – Hypothalamus                      | 108                                           |
| Brain - Nucleus accumbens (basal ganglia) | 130                                           |
| Brain - Putamen (basal ganglia)           | 111                                           |
| Brain - Spinal cord (cervical c-1)        | 83                                            |
| Brain - Substantia nigra                  | 80                                            |
| Breast - Mammary Tissue                   | 251                                           |
| Cells - EBV-transformed lymphocytes       | 117                                           |
| Cells - Transformed fibroblasts           | 300                                           |
| Colon – Sigmoid                           | 203                                           |
| Colon – Transverse                        | 246                                           |
| Esophagus - Gastroesophageal Junction     | 213                                           |
| Esophagus – Mucosa                        | 358                                           |
| Esophagus – Muscularis                    | 335                                           |
| Heart - Atrial Appendage                  | 264                                           |
| Heart - Left Ventricle                    | 272                                           |
| Liver                                     | 153                                           |
| Lung                                      | 383                                           |
| Minor Salivary Gland                      | 85                                            |
| Muscle – Skeletal                         | 491                                           |
| Nerve – Tibial                            | 361                                           |
| Ovary                                     | 122                                           |
| Pancreas                                  | 220                                           |
| Pituitary                                 | 157                                           |
| Prostate                                  | 132                                           |
| Skin - Not Sun Exposed (Suprapubic)       | 335                                           |

|                                  |     |
|----------------------------------|-----|
| Skin - Sun Exposed (Lower leg)   | 414 |
| Small Intestine - Terminal Ileum | 122 |
| Spleen                           | 146 |
| Stomach                          | 237 |
| Testis                           | 225 |
| Thyroid                          | 399 |
| Uterus                           | 101 |
| Vagina                           | 106 |
| Whole Blood                      | 369 |

## References

1. Lambert, J.C., et al., *Meta-analysis of 74,046 individuals identifies 11 new susceptibility loci for Alzheimer's disease*. Nat Genet, 2013. **45**(12): p. 1452-8.
2. van Rheenen, W., et al., *Genome-wide association analyses identify new risk variants and the genetic architecture of amyotrophic lateral sclerosis*. Nat Genet, 2016. **48**(9): p. 1043-8.
3. Astle, W.J., et al., *The Allelic Landscape of Human Blood Cell Trait Variation and Links to Common Complex Disease*. Cell, 2016. **167**(5): p. 1415-1429 e19.
4. Locke, A.E., et al., *Genetic studies of body mass index yield new insights for obesity biology*. Nature, 2015. **518**(7538): p. 197-206.
5. Nikpay, M., et al., *A comprehensive 1,000 Genomes-based genome-wide association meta-analysis of coronary artery disease*. Nat Genet, 2015. **47**(10): p. 1121-1130.
6. Liu, J.Z., et al., *Association analyses identify 38 susceptibility loci for inflammatory bowel disease and highlight shared genetic risk across populations*. Nat Genet, 2015. **47**(9): p. 979-986.
7. Felix, J.F., et al., *Genome-wide association analysis identifies three new susceptibility loci for childhood body mass index*. Hum Mol Genet, 2016. **25**(2): p. 389-403.
8. Okbay, A., et al., *Genetic variants associated with subjective well-being, depressive symptoms, and neuroticism identified through genome-wide analyses*. Nat Genet, 2016. **48**(6): p. 624-33.
9. International Consortium for Blood Pressure Genome-Wide Association, S., et al., *Genetic variants in novel pathways influence blood pressure and cardiovascular disease risk*. Nature, 2011. **478**(7367): p. 103-9.
10. Okbay, A., et al., *Genome-wide association study identifies 74 loci associated with educational attainment*. Nature, 2016. **533**(7604): p. 539-42.
11. Manning, A.K., et al., *A genome-wide approach accounting for body mass index identifies genetic variants influencing fasting glycemic traits and insulin resistance*. Nat Genet, 2012. **44**(6): p. 659-69.

12. Teslovich, T.M., et al., *Biological, clinical and population relevance of 95 loci for blood lipids*. *Nature*, 2010. **466**(7307): p. 707-13.
13. Wood, A.R., et al., *Defining the role of common variation in the genomic and biological architecture of adult human height*. *Nat Genet*, 2014. **46**(11): p. 1173-86.
14. den Hoed, M., et al., *Identification of heart rate-associated loci and their effects on cardiac conduction and rhythm disorders*. *Nat Genet*, 2013. **45**(6): p. 621-31.
15. Hammerschlag, A.R., et al., *Genome-wide association analysis of insomnia complaints identifies risk genes and genetic overlap with psychiatric and metabolic traits*. *Nat Genet*, 2017. **49**(11): p. 1584-1592.
16. Sniekers, S., et al., *Genome-wide association meta-analysis of 78,308 individuals identifies new loci and genes influencing human intelligence*. *Nat Genet*, 2017. **49**(7): p. 1107-1112.
17. Day, F.R., et al., *Genomic analyses identify hundreds of variants associated with age at menarche and support a role for puberty timing in cancer risk*. *Nat Genet*, 2017. **49**(6): p. 834-841.
18. Day, F.R., et al., *Large-scale genomic analyses link reproductive aging to hypothalamic signaling, breast cancer susceptibility and BRCA1-mediated DNA repair*. *Nat Genet*, 2015. **47**(11): p. 1294-1303.
19. Okada, Y., et al., *Genetics of rheumatoid arthritis contributes to biology and drug discovery*. *Nature*, 2014. **506**(7488): p. 376-81.
20. Schizophrenia Working Group of the Psychiatric Genomics, C., *Biological insights from 108 schizophrenia-associated genetic loci*. *Nature*, 2014. **511**(7510): p. 421-7.
21. Scott, R.A., et al., *An Expanded Genome-Wide Association Study of Type 2 Diabetes in Europeans*. *Diabetes*, 2017. **66**(11): p. 2888-2902.
22. Shungin, D., et al., *New genetic loci link adipose and insulin biology to body fat distribution*. *Nature*, 2015. **518**(7538): p. 187-196.
